# Supplementary material for: Large-Scale SNP Discovery through RNA Sequencing and SNP Genotyping by Targeted Enrichment Sequencing in Cassava (Manihot esculenta Crantz)
Source: PubMed Central journal article supplement (PMC4281258; doi:10.1371/journal.pone.0116028), 2014-12-31
Supplement: pone.0116028.s001.pdf [file pone.0116028.s001.pdf]

Probe locations

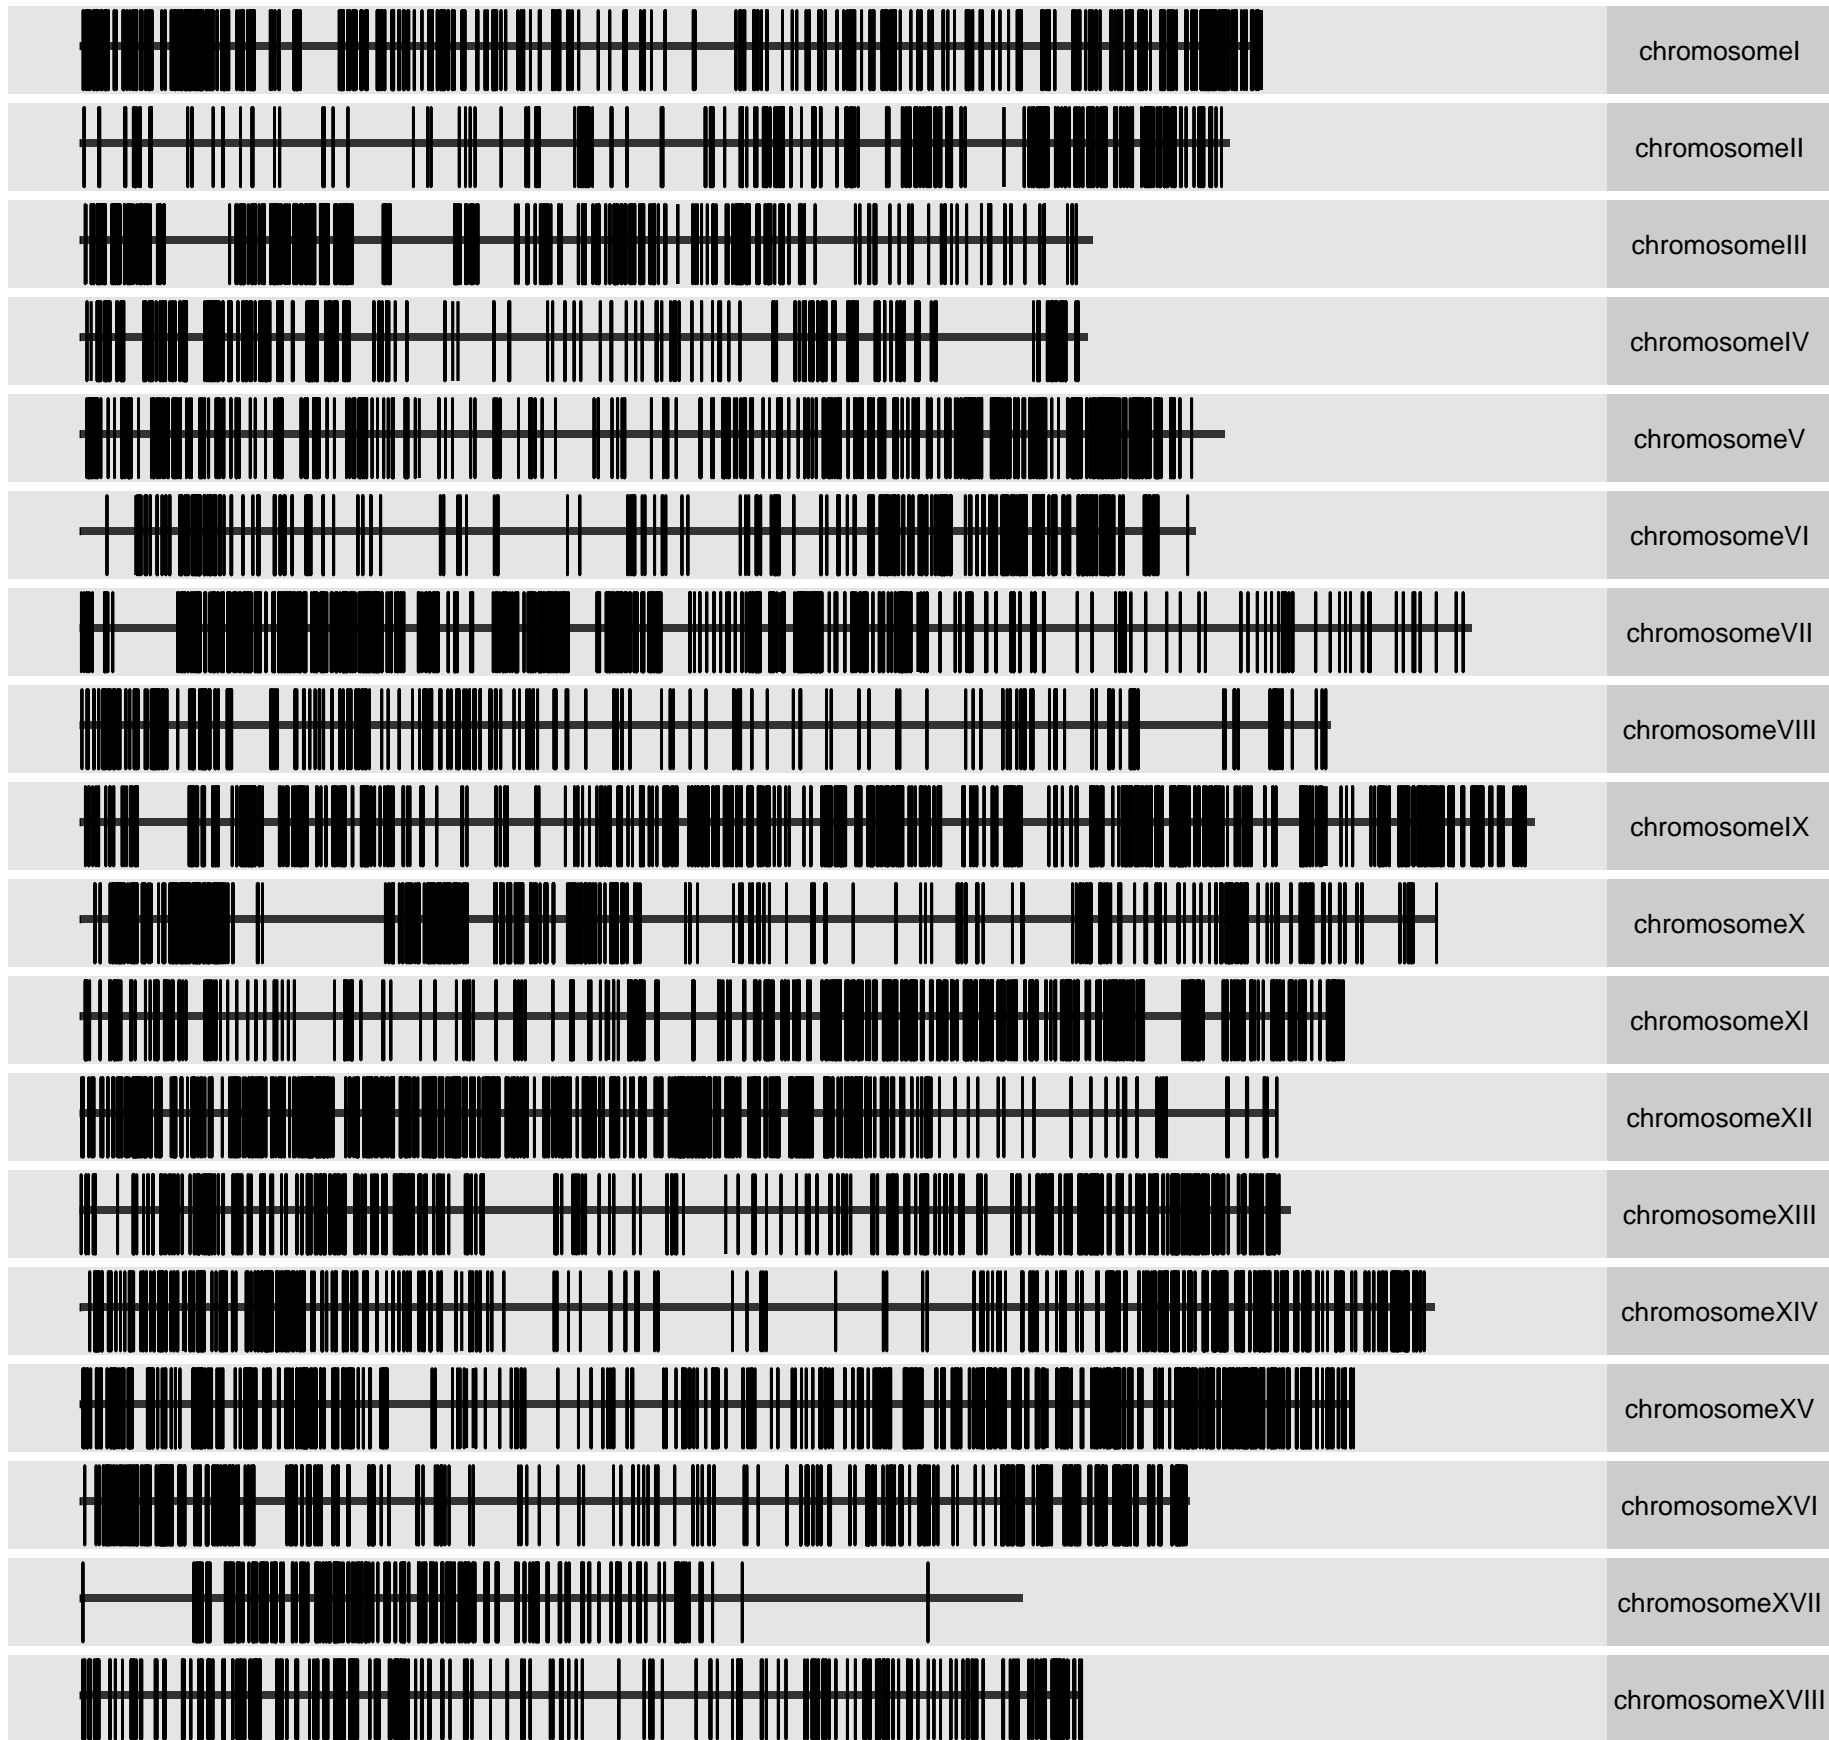

0.0e+00

5.0e+06

1.0e+07

1.5e+07

2.0e+07

2.5e+07

Chromosome Length (Mb)
